# Supplementary material for: Nicotinamide Mononucleotide Ameliorates Silica-Induced Lung Injury through the Nrf2-Regulated Glutathione Metabolism Pathway in Mice
Source: MDPI journal article supplement (doi:10.3390/nu15010143), 2022-12-28

**Supplementary Materials File S1: NMN purity assay**

NMN detection procedure

Sample solution: 0.5 mg/mL of NMN in Diluent.

Solution A: 6.8 g/L of potassium dihydrogen phosphate in water.

Solution B: Methanol.

Diluent: Water.

Mobile phase: See below.

| Time(min) | Solution A (%) | Solution B (%) |
|-----------|----------------|----------------|
| 0         | 100            | 0              |
| 10        | 100            | 0              |
| 20        | 50             | 50             |
| 21        | 100            | 0              |
| 29        | 100            | 0              |

**Chromatographic system**

Mode: LC

Detector: UV 260nm

Column: WelchUltimate AQ-C18 4.6-mm × 25-cm; 5-μm

Column temperature: 30°C

Flow rate: 0.8 mL/min

Injection volume: 10 μL

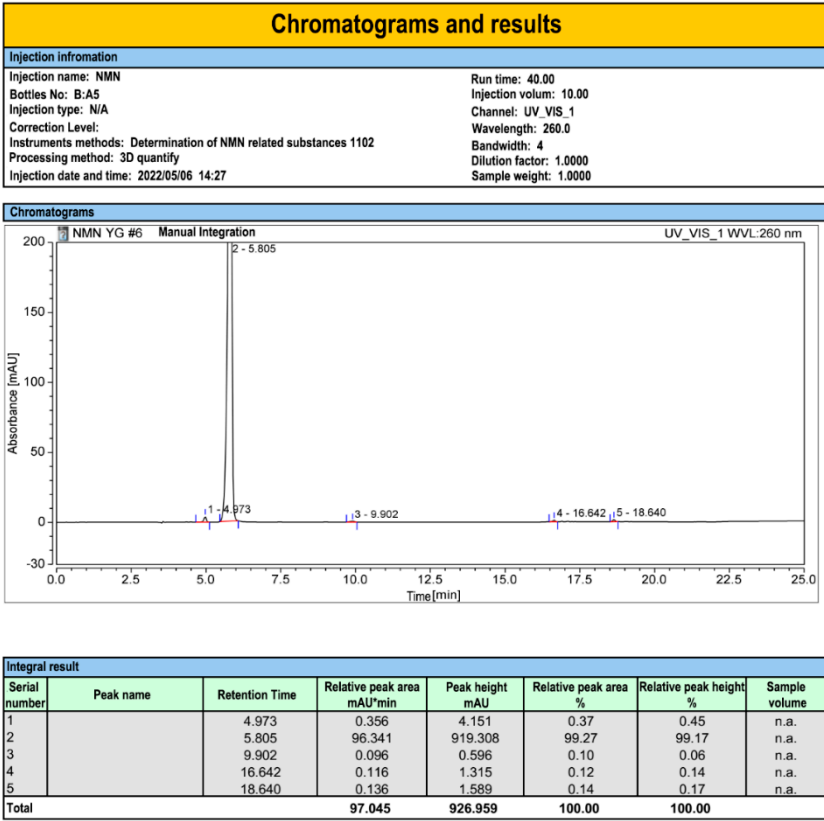

Supplement: s1 [file s1]
