# Supplementary material for: Nicotinamide Mononucleotide Ameliorates Silica-Induced Lung Injury through the Nrf2-Regulated Glutathione Metabolism Pathway in Mice
Source: MDPI journal article supplement (doi:10.3390/nu15010143), 2022-12-28
Supplement: s1 [file s1]

# Supplementary Figures

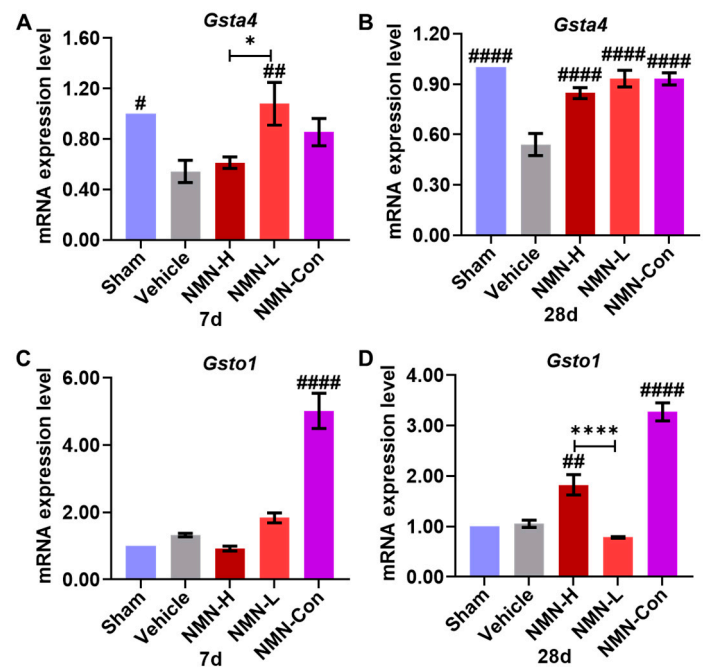

**Supplementary Figure S1.** Effects of silica exposure and NMN supplementation on *Gsta4* and *Gsto1* expression in lung tissue.

(A) The relative expression level of *Gsta4* mRNA in lung tissue at 7 d; (B) relative expression level of *Gsta4* mRNA in lung tissue at 28 d; (C) relative expression level of *Gsto1* mRNA in lung tissue at 7d; (D) relative expression level of *Gsto1* mRNA in lung tissue at 7d. (# means  $P < 0.05$ , ## means  $P < 0.01$ , #### means  $P < 0.0001$  vs Vehicle; \* means  $P < 0.05$ , \*\*\*\* means  $P < 0.0001$ , NMN-H vs NMN-L). Sham: saline + saline; Vehicle: silica + saline; NMN-H: silica + NMN (1000 mg/kg); NMN-L: silica + NMN (500 mg/kg); NMN-Con: saline + NMN (1000 mg/kg).

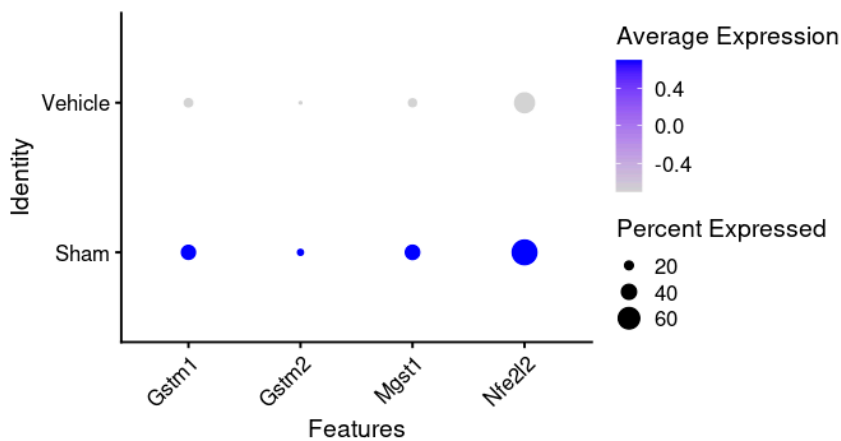

**Supplementary Figure S2.** The expression of *Gstm1*, *Gstm2*, *Mgst1* and *Nfe2l2* in lung tissue after silica exposure.

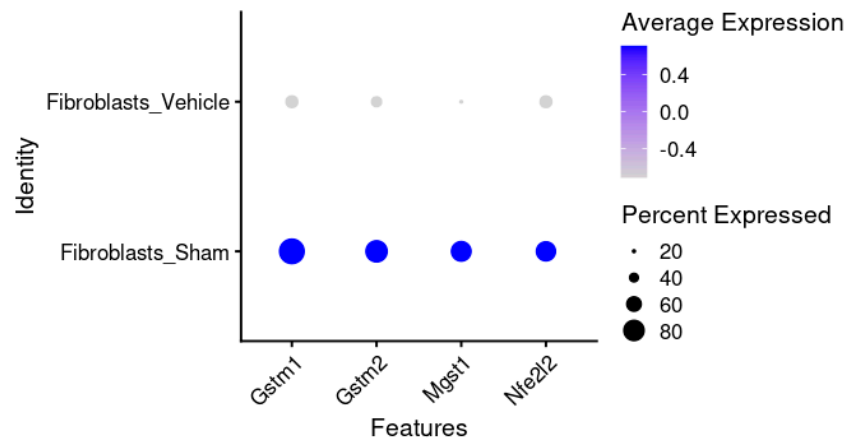

**Supplementary Figure S3.** The expression of *Gstm1*, *Gstm2*, *Mgst1* and *Nfe2l2* in fibroblasts after silica exposure.
