# Supplementary material for: Nicotinamide Mononucleotide Ameliorates Silica-Induced Lung Injury through the Nrf2-Regulated Glutathione Metabolism Pathway in Mice
Source: Nutrients. 2022 Dec 28;15(1):143. doi: 10.3390/nu15010143 (PMC9823503; doi:10.3390/nu15010143)
Supplement: Supplementary file 1 [file nutrients-15-00143-s001.zip › Revised Supplementary Tables-nutrients.xlsx]

## Sheet: Supplementary Table S1 
Supplementary Table S1 The top 10 GO terms of Biological Process, Cellular Component and Molecular Function.
GO_ID	GO_Term	GO_function	GO_class	S gene number	TS gene number	B gene number	TB gene number	pvalue
GO:0003341	cilium movement	biological_process	6	27	3074	42	16705	6.99154e-11
GO:0030593	neutrophil chemotaxis	biological_process	7	31	3074	71	16705	7.83385e-07
GO:0030317	flagellated sperm motility	biological_process	5	31	3074	71	16705	7.83385e-07
GO:0007018	microtubule-based movement	biological_process	5	32	3074	75	16705	9.78081e-07
GO:0009617	response to bacterium	biological_process	7	58	3074	150	16705	4.28727e-09
GO:0006955	immune response	biological_process	4	83	3074	218	16705	5.52203e-12
GO:0030198	extracellular matrix organization	biological_process	6	54	3074	151	16705	3.02303e-07
GO:0006954	inflammatory response	biological_process	6	105	3074	310	16705	4.11297e-11
GO:0002376	immune system process	biological_process	3	136	3074	429	16705	1.32342e-11
GO:0045087	innate immune response	biological_process	5	119	3074	376	16705	2.84789e-10
GO:0036126	sperm flagellum	cellular_component	5	27	3074	59	16705	1.30067e-06
GO:0005930	axoneme	cellular_component	6	43	3074	98	16705	5.114e-09
GO:0031514	motile cilium	cellular_component	5	48	3074	124	16705	8.66652e-08
GO:0005929	cilium	cellular_component	4	116	3074	348	16705	1.26935e-11
GO:0009897	external side of plasma membrane	cellular_component	5	102	3074	343	16705	1.77907e-07
GO:0005615	extracellular space	cellular_component	4	326	3074	1136	16705	9.99201e-16
GO:0005576	extracellular region	cellular_component	3	375	3074	1357	16705	2.22045e-16
GO:0009986	cell surface	cellular_component	4	166	3074	606	16705	2.00253e-08
GO:0005887	integral component of plasma membrane	cellular_component	6	216	3074	861	16705	3.40516e-07
GO:0005886	plasma membrane	cellular_component	4	817	3074	3842	16705	1.43926e-07
GO:0008569	ATP-dependent microtubule motor activity	molecular_function	12	12	3074	18	16705	9.06848e-06
GO:0004364	glutathione transferase activity	molecular_function	6	16	3074	31	16705	2.98973e-05
GO:0051287	NAD binding	molecular_function	6	20	3074	46	16705	7.51624e-05
GO:0003774	motor activity	molecular_function	9	48	3074	114	16705	3.56025e-09
GO:0008009	chemokine activity	molecular_function	8	18	3074	43	16705	0.000303447
GO:0001540	amyloid-beta binding	molecular_function	6	21	3074	51	16705	0.000129916
GO:0003777	microtubule motor activity	molecular_function	10	27	3074	67	16705	2.38338e-05
GO:0016829	lyase activity	molecular_function	4	46	3074	152	16705	0.000255567
GO:0004888	transmembrane signaling receptor activity	molecular_function	5	48	3074	161	16705	0.000280239
GO:0005509	calcium ion binding	molecular_function	7	162	3074	602	16705	1.06455e-07
“BP” means biological process, “CC” means cellular component, “MF” means molecular function

## Sheet: Supplementary Table S2
Supplementary Table S2 KEGG enrichment analysis of 30 differential genes
pathway_id	pathway_name	S gene number	TS gene number	B gene number	TB gene number	pvalue	Gene number	Differential genes enriched in GO analysis
ko00980	Metabolism of xenobiotics by cytochrome P450	23	1348	45	6693	3.40762e-06	5	Gsto1, Gsta4, Mgst1, Gstm1, Ephx1
ko00982	Drug metabolism - cytochrome P450	23	1348	46	6693	5.52801e-06	4	Gsto1, Gsta4, Mgst1, Gstm1
ko05204	Chemical carcinogenesis	24	1348	53	6693	2.93314e-05	5	Gsto1, Gsta4, Mgst1, Gstm1, Ephx1
ko00480	Glutathione metabolism	26	1348	60	6693	3.56004e-05	4	Gsto1, Gsta4, Mgst1, Gstm1
ko05322	Systemic lupus erythematosus	47	1348	121	6693	1.39075e-06	2	c, H2bc4
ko04640	Hematopoietic cell lineage	32	1348	88	6693	0.000280717	1	Cd24a
ko04610	Complement and coagulation cascades	28	1348	76	6693	0.000518828	1	Serping1
ko00830	Retinol metabolism	16	1348	43	6693	0.00706489	1	Aldh1a1
ko05414	Dilated cardiomyopathy (DCM)	27	1348	85	6693	0.00735513	1	Atp2a2
ko05034	Alcoholism	49	1348	176	6693	0.00802096	2	H2bc4, c
ko05033	Nicotine addiction	12	1348	31	6693	0.0132423	1	Gabrp
ko04612	Antigen processing and presentation	22	1348	69	6693	0.014023	2	B2m, Hsp90aa1
ko04020	Calcium signaling pathway	48	1348	178	6693	0.0158617	1	Atp2a2
ko05418	Fluid shear stress and atherosclerosis	38	1348	138	6693	0.0214683	5	Gsto1, Gsta4, Mgst1, Gstm1, Hsp90aa1
ko05410	Hypertrophic cardiomyopathy (HCM)	24	1348	82	6693	0.030372	1	Atp2a2
ko05133	Pertussis	22	1348	74	6693	0.0313607	1	Serping1
ko04261	Adrenergic signaling in cardiomyocytes	37	1348	141	6693	0.0459387	1	Atp2a2
ko03320	PPAR signaling pathway	21	1348	73	6693	0.0487256	1	Lpl
ko04621	NOD-like receptor signaling pathway	39	1348	153	6693	0.0614399	1	Hsp90aa1
ko04022	cGMP-PKG signaling pathway	41	1348	163	6693	0.0673812	1	Atp2a2
ko04080	Neuroactive ligand-receptor interaction	63	1348	263	6693	0.0695556	1	Gabrp
ko04260	Cardiac muscle contraction	18	1348	68	6693	0.125299	1	Atp2a2
ko04151	PI3K-Akt signaling pathway	73	1348	321	6693	0.132049	1	Hsp90aa1
ko05412	Arrhythmogenic right ventricular cardiomyopathy (ARVC)	18	1348	69	6693	0.13923	1	Atp2a2
ko04972	Pancreatic secretion	22	1348	87	6693	0.142761	1	Atp2a2
ko04976	Bile secretion	17	1348	66	6693	0.160792	1	Ephx1
ko04216	Ferroptosis	11	1348	40	6693	0.165822	1	Cp
ko04024	cAMP signaling pathway	43	1348	188	6693	0.194903	1	Atp2a2
ko00983	Drug metabolism - other enzymes	16	1348	65	6693	0.223028	5	Gsto1, Gsta4, Mgst1, Gstm1, Ces1d
ko04723	Retrograde endocannabinoid signaling	29	1348	129	6693	0.283395	1	Gabrp
ko04217	Necroptosis	33	1348	151	6693	0.328426	1	Ppia
ko01524	Platinum drug resistance	17	1348	75	6693	0.33466	5	Gsto1, Gsta4, Mgst1, Gstm1, Ces1d
ko04657	IL-17 signaling pathway	19	1348	85	6693	0.345247	1	Hsp90aa1
ko04914	Progesterone-mediated oocyte maturation	18	1348	84	6693	0.426537	1	Hsp90aa1
ko00860	Porphyrin and chlorophyll metabolism	6	1348	26	6693	0.429684	1	Cp
ko00561	Glycerolipid metabolism	12	1348	58	6693	0.5108	1	Lpl
ko05032	Morphine addiction	17	1348	83	6693	0.513032	1	Gabrp
ko04662	B cell receptor signaling pathway	14	1348	69	6693	0.53594	1	Ifitm1
ko05225	Hepatocellular carcinoma	33	1348	167	6693	0.58077	5	Gsto1, Gsta4, Mgst1, Gstm1, Ephx1
ko05215	Prostate cancer	18	1348	93	6693	0.616835	1	Hsp90aa1
ko05169	Epstein-Barr virus infection	38	1348	196	6693	0.633831	1	B2m
ko05010	Alzheimer disease	30	1348	158	6693	0.673952	1	Atp2a2
ko04979	Cholesterol metabolism	8	1348	46	6693	0.73524	1	Lpl
ko04915	Estrogen signaling pathway	21	1348	120	6693	0.798493	2	Krt19, Hsp90aa1
ko05200	Pathways in cancer	93	1348	499	6693	0.823053	5	Gsto1, Gsta4, Mgst1, Gstm1, Ces1d
ko04727	GABAergic synapse	13	1348	79	6693	0.8318	1	Gabrp
ko05203	Viral carcinogenesis	36	1348	207	6693	0.862944	2	c, H2bc4
ko04919	Thyroid hormone signaling pathway	18	1348	115	6693	0.911242	1	Atp2a2
ko04659	Th17 cell differentiation	12	1348	100	6693	0.988928	1	Hsp90aa1
ko05163	Human cytomegalovirus infection	31	1348	220	6693	0.992809	1	B2m
ko05170	Human immunodeficiency virus 1 infection	26	1348	202	6693	0.997714	1	B2m
ko05166	Human T-cell leukemia virus 1 infection	29	1348	224	6693	0.998413	1	B2m
ko05168	Herpes simplex virus 1 infection	54	1348	387	6693	0.999546	1	B2m
ko04141	Protein processing in endoplasmic reticulum	15	1348	158	6693	0.999919	1	Hsp90aa1
